# Supplementary material for: Ecological monitoring of disturbed mountain peatlands: an analysis based on desmids
Source: Springer Nature journal article supplement (doi:10.1007/s10531-023-02624-9), 2023-05-29
Supplement: MOESM1 [file 25420776]

## Sheet: List1
Title: Ecological monitoring of disturbed mountain peatlands – an analysis based on desmids
Journal name: Biodiversity & Conservation
Author names: Jiri Neustupa, Jan Stastny, Katerina Woodard
Corresponding author: Jiri Neustupa, Department of Botany, Faculty of Science, Charles University Prague, email: neustupa@natur.cuni.cz
Online Resource 1 Desmid species found in 207 samples, with their basic abiotic factors, geographic coordinates, habitat type designations, and NCV scores
species	code	NCV score - R	NCV score - S	1	2	3	4	5	6	7	8	9	10	11	12	13	14	15	16	17	18	19	20	21	22	23	24	25	26	27	28	29	30	31	32	33	34	35	36	37	38	39	40	41	42	43	44	45	46
Actinotaenium cruciferum	ACCR	3	0	-	-	-	-	-	-	-	-	-	-	-	-	-	-	-	-	-	-	-	-	-	-	-	-	-	-	-	-	-	-	-	-	-	-	-	-	-	-	-	-	-	-	-	-	-	-
Actinotaenium cucurbita	ACCU	0	1	-	-	-	-	-	-	-	+	-	++	++	-	-	-	-	-	r	-	+	+	r	r	-	-	-	-	-	-	-	-	r	-	-	-	-	-	-	-	-	-	-	-	-	-	-	-
Actinotaenium perminutum	ACPR	3	3	-	-	-	-	-	-	-	-	-	-	-	-	-	-	-	-	-	-	-	-	r	-	-	-	-	-	-	-	-	-	-	-	-	-	-	-	-	-	-	-	-	-	-	-	-	-
Actinotaenium silvae-nigrae	ACSN	1	2	-	-	-	-	-	-	-	r	-	+	+	-	-	-	-	-	+	r	r	++	r	-	-	-	-	-	-	-	-	-	-	r	-	-	-	-	-	-	-	-	-	-	+	-	-	-
Actinotaenium sp.	ACSP	0	0	-	-	-	-	-	-	-	-	-	-	-	-	-	-	-	-	-	-	-	-	-	+	-	-	-	-	-	-	-	-	-	-	-	-	-	-	-	-	-	-	-	-	-	r	-	-
Bambusina borreri	BABO	0	2	-	-	-	-	-	-	-	-	-	-	-	-	-	-	-	-	-	-	-	-	-	-	-	+	-	-	-	-	-	-	-	-	-	-	r	+	-	-	-	-	-	-	-	-	-	-
Closterium abruptum	CLAR	1	0	-	-	-	-	-	-	-	-	-	-	-	-	-	-	-	-	-	-	-	-	-	-	-	-	-	-	-	-	-	-	-	-	-	-	-	-	-	-	-	-	+	-	-	-	-	-
Closterium abruptum var. brevius	CLAB	2	1	-	-	-	-	-	-	-	-	-	-	-	-	-	-	-	-	-	-	-	-	-	-	-	-	-	-	-	-	-	-	-	-	-	-	-	-	-	-	-	-	-	-	-	-	-	-
Closterium acerosum var. acerosum	CLAC	0	0	-	-	-	-	-	-	-	-	-	-	-	-	-	-	-	-	-	-	-	-	-	-	-	-	-	-	-	-	-	-	-	-	-	-	-	-	-	-	-	-	-	-	-	-	-	-
Closterium acerosum var. elongatum	CLAE	0	0	-	-	-	-	-	-	-	-	-	-	-	-	-	-	-	-	-	-	-	-	-	-	-	-	-	-	-	-	-	-	-	-	-	-	-	-	-	-	-	-	-	-	-	-	-	-
Closterium aciculare	CLAI	1	0	-	-	-	-	-	-	-	-	-	-	-	-	-	-	-	-	-	-	-	-	-	-	-	-	-	r	-	-	-	-	-	-	-	-	-	-	-	-	-	-	-	-	-	-	-	-
Closterium acutum	CLAT	0	0	-	-	-	-	-	-	-	-	-	-	-	-	-	-	-	-	-	-	-	-	-	-	-	-	-	-	-	-	-	-	-	-	-	-	-	-	-	-	-	-	-	-	-	-	-	-
Closterium calosporum var. brasiliense	CLCB	3	3	-	-	-	-	-	-	-	-	-	-	-	-	-	-	-	-	-	-	-	-	-	-	-	-	-	-	-	-	-	-	-	-	-	-	-	-	-	-	-	+	r	-	-	-	-	-
Closterium calosporum var. calosporum	CLCC	1	1	-	-	-	-	-	-	-	-	-	-	-	-	-	-	-	-	-	-	-	-	-	-	-	-	-	-	-	-	-	-	-	-	-	-	-	-	-	-	-	-	-	-	-	-	-	-
Closterium cornu	CLCR	0	0	-	-	-	-	-	-	-	-	-	-	-	-	-	-	-	-	-	-	-	-	-	-	-	-	-	-	-	-	-	-	-	-	-	-	-	-	-	-	-	-	-	-	-	-	-	-
Closterium costatum	CLCO	1	2	-	-	-	-	-	-	-	-	-	-	-	-	-	-	-	-	-	-	-	-	-	-	-	+	-	-	-	-	-	-	-	-	-	-	-	-	-	-	-	-	-	-	-	-	-	-
Closterium cynthia	CLCY	1	2	-	-	-	-	-	-	-	-	-	-	-	-	-	-	-	-	-	-	-	-	-	-	-	-	-	-	-	-	-	-	-	-	-	-	-	-	-	-	-	-	-	-	-	-	-	-
Closterium dianae var. arcuatum	CLDA	1	2	-	-	-	-	-	-	-	-	-	-	-	-	-	-	-	-	-	-	-	-	-	-	-	-	-	-	-	-	-	-	-	-	-	-	-	-	-	-	-	-	-	-	-	-	-	-
Closterium dianae var. dianae	CLDD	0	1	-	-	-	-	-	-	-	-	-	-	-	-	-	-	-	-	-	-	-	-	-	-	-	-	-	-	-	-	-	-	-	-	-	-	-	-	-	-	-	-	-	-	-	-	-	-
Closterium dianae var. minus	CLDM	1	1	-	-	-	r	-	-	-	-	-	-	-	-	-	-	-	-	-	-	-	-	-	-	-	-	-	-	-	-	-	-	r	-	-	-	-	-	-	-	+	-	-	-	-	-	-	-
Closterium dianae var. pseudodianae	CLDP	3	2	-	-	-	-	-	-	-	-	-	-	-	-	-	-	-	-	-	-	-	-	-	-	-	-	-	-	-	-	-	-	-	-	-	-	-	-	-	-	-	-	-	-	-	-	-	-
Closterium directum	CLDR	2	2	-	-	-	-	-	-	-	-	-	-	-	-	-	-	-	-	-	-	-	-	-	-	-	-	-	-	-	-	-	-	-	-	-	-	-	-	-	-	-	-	-	-	-	-	-	-
Closterium ehrenbergii	CLEH	0	0	-	-	-	-	-	-	-	-	-	-	-	-	-	-	-	-	-	-	-	-	-	-	-	-	-	-	-	-	-	-	-	-	-	-	-	-	-	-	+	-	-	-	-	-	-	-
Closterium gracile	CLGR	0	2	-	-	-	-	-	-	-	-	-	-	-	-	-	-	-	-	-	-	-	-	-	-	-	-	-	-	-	-	-	-	-	-	-	-	-	-	-	-	-	-	-	-	-	-	-	-
Closterium idiosporum	CLID	1	0	-	-	-	-	-	-	-	-	-	-	-	-	-	-	-	-	-	-	-	-	-	-	-	-	-	-	-	-	-	-	-	-	-	-	-	-	-	-	-	-	-	-	-	-	-	-
Closterium incurvum	CLIN	0	0	-	-	-	-	-	-	-	-	-	-	-	-	-	-	-	-	-	-	-	-	-	-	-	-	-	-	-	-	-	-	-	-	-	-	-	-	-	-	-	r	r	-	-	-	-	-
Closterium intermedium	CLIM	0	1	-	-	-	-	-	-	-	-	-	-	-	-	-	-	-	-	-	-	-	-	-	-	-	-	-	-	-	-	-	-	-	-	-	-	-	-	-	-	-	++	-	-	-	-	-	-
Closterium juncidum	CLJU	1	2	-	r	++	-	-	-	-	-	-	-	-	-	-	-	-	-	-	-	-	-	-	-	-	-	-	-	-	-	-	-	-	-	-	-	-	-	-	-	-	-	-	-	-	-	-	-
Closterium kützingii	CLKU	0	0	-	-	-	-	-	-	-	-	-	-	-	-	-	-	-	-	-	-	-	-	-	-	-	-	-	-	-	-	-	-	r	-	-	-	-	-	-	-	-	-	-	++	-	-	-	-
Closterium littorale	CLLI	2	0	-	-	-	+	-	-	-	-	-	-	-	-	-	-	-	-	-	-	-	-	-	-	-	-	-	-	-	-	-	-	-	-	-	-	-	-	-	-	-	-	-	-	-	-	-	-
Closterium lunula	CLLU	0	1	+	-	-	-	-	-	-	-	-	-	-	-	-	-	-	-	-	-	-	-	-	-	-	+	-	-	-	-	-	-	-	-	-	-	-	-	-	-	-	-	r	-	-	-	-	-
Closterium moniliferum	CLMO	0	0	-	-	-	-	-	-	-	-	-	-	-	-	-	-	-	-	-	-	-	-	-	-	-	-	-	+	-	-	-	-	-	-	-	-	-	-	-	-	-	-	-	-	-	-	-	-
Closterium navicula	CLNA	0	0	-	-	-	-	-	-	-	-	-	-	-	-	-	-	-	-	-	-	-	-	-	-	-	-	-	-	-	-	-	-	-	-	-	-	-	-	-	-	-	-	-	-	-	-	-	-
Closterium parvulum	CLPV	0	0	-	-	-	-	-	-	-	-	-	-	-	-	-	-	-	-	-	-	-	-	-	-	-	-	-	r	-	-	-	-	++	-	-	-	-	-	-	-	-	-	-	-	-	-	-	-
Closterium praelongum var. brevius	CLPB	0	0	-	-	-	-	-	-	-	-	-	-	-	-	-	-	-	-	-	-	-	-	-	-	-	-	-	-	-	-	-	-	-	-	-	-	-	-	-	-	-	-	-	-	-	-	-	-
Closterium praelongum var. praelongum	CLPP	0	0	-	-	-	-	-	-	-	-	-	-	-	-	-	-	-	-	-	-	-	-	-	-	-	-	-	-	-	-	-	-	-	-	-	-	-	-	-	-	-	-	-	-	-	-	-	-
Closterium pritchardianum	CLPR	0	0	-	-	-	-	-	-	-	-	-	-	-	-	-	-	-	-	-	-	-	-	-	-	-	-	-	-	-	-	-	-	-	-	-	-	-	-	-	-	-	-	-	-	-	-	-	-
Closterium pronum	CLPO	0	1	-	-	-	-	-	-	-	-	-	-	-	-	-	-	-	-	-	-	-	-	-	-	-	-	-	-	-	-	-	-	-	-	-	-	-	-	-	-	-	-	-	-	-	-	-	-
Closterium ralfsii var. hybridum	CLRH	1	2	r	-	-	-	-	-	-	-	-	-	-	-	-	-	-	-	-	-	-	-	-	-	-	-	-	-	-	-	-	-	-	-	-	-	-	-	-	-	-	+	-	-	-	-	-	-
Closterium regulare	CLRE	2	2	-	-	+	-	-	-	-	-	-	-	-	-	-	-	-	-	-	-	-	-	-	-	-	-	-	-	-	-	-	-	-	-	-	-	-	-	-	-	-	-	-	-	-	-	-	-
Closterium rostratum	CLRO	0	0	-	-	-	-	-	-	-	-	-	-	-	-	-	-	-	-	-	-	-	-	-	-	-	-	r	-	-	-	-	-	-	-	-	-	-	-	-	-	-	-	-	-	-	-	-	-
Closterium setaceum	CLSE	1	2	-	-	-	-	-	-	-	-	-	-	-	-	-	-	-	-	-	-	-	-	-	-	-	-	-	-	-	-	-	-	-	-	-	-	-	-	-	-	-	-	-	-	-	-	-	-
Closterium striolatum	CLST	0	0	-	-	-	-	-	-	-	-	-	-	-	-	+	-	++	r	-	-	-	-	-	-	-	-	-	-	++	-	r	+	r	-	-	-	-	-	-	-	r	+	r	-	-	-	-	++
Closterium submoniliferum	CLSU	0	0	r	-	-	-	-	-	-	-	-	-	-	-	-	-	-	-	-	-	-	-	-	-	-	-	-	-	-	-	r	-	-	-	-	-	-	-	-	-	-	-	-	-	-	-	-	-
Closterium tumidulum	CLTD	0	0	-	-	-	-	-	-	-	-	-	-	-	-	-	-	-	-	-	-	-	-	-	-	-	-	-	-	-	-	-	-	-	-	-	-	-	-	-	-	-	-	-	-	-	-	-	-
Closterium tumidum var. nylandicum	CLTN	3	0	-	-	-	-	-	-	-	-	-	-	-	-	-	-	-	-	-	-	-	-	-	-	-	-	-	-	-	-	-	-	-	-	-	-	-	-	-	-	-	-	-	-	-	-	-	-
Closterium tumidum var. tumidum	CLTT	2	0	-	-	-	-	-	-	-	-	-	-	-	-	-	-	-	-	-	-	-	-	-	-	-	-	-	-	-	-	-	-	-	-	-	-	-	-	-	-	-	-	-	-	-	-	-	-
Closterium venus	CLVE	0	0	r	-	-	-	-	-	-	-	-	-	-	-	-	-	-	-	-	-	-	-	-	-	-	-	-	-	-	-	-	-	-	-	-	-	-	-	-	-	-	-	-	-	-	-	-	-
Cosmarium blyttii var. novae-sylvae	COBN	1	2	-	-	-	-	-	-	-	-	-	-	-	-	-	-	-	-	-	-	-	-	-	-	-	-	-	-	-	-	-	-	-	-	-	-	-	-	-	-	-	-	-	-	-	-	-	-
Cosmarium botrytis	COBR	2	0	-	-	-	-	-	-	-	-	-	-	-	-	-	-	-	-	-	-	-	-	-	-	-	-	-	+	-	-	r	-	-	-	-	-	-	-	-	-	-	-	-	-	-	-	-	-
Cosmarium crenatum	COCR	1	0	-	-	-	-	-	-	-	-	-	-	-	-	-	-	-	-	-	-	-	-	-	-	-	-	-	-	-	-	-	-	-	-	-	-	-	-	-	-	-	-	-	-	-	-	-	-
Cosmarium decedens	CODC	3	0	-	-	-	-	-	-	-	-	-	-	-	-	-	-	-	-	-	-	-	-	-	-	-	-	-	-	-	-	-	-	-	-	-	-	-	-	-	-	-	-	-	-	-	-	-	-
Cosmarium formosulum	COFO	0	0	-	-	r	-	-	-	-	-	-	-	-	-	-	-	-	-	-	-	-	-	-	-	-	-	-	-	-	-	-	-	-	-	-	-	-	-	-	-	-	-	-	-	-	-	-	-
Cosmarium goniodes var. subturgidum	COGS	1	2	-	-	-	-	-	-	-	-	-	-	-	-	-	-	-	-	-	-	-	-	-	-	-	-	-	-	-	-	-	-	-	-	-	-	-	-	-	-	-	-	-	-	-	-	-	-
Cosmarium impressulum	COIM	0	0	r	-	-	-	-	-	-	-	-	-	-	-	-	-	-	-	-	-	-	-	-	-	-	-	-	-	-	-	-	-	-	-	-	-	-	-	-	-	-	-	-	-	-	-	-	-
Cosmarium margaritiferum	COMG	1	2	-	-	-	-	-	-	-	-	-	-	-	-	-	-	-	-	-	-	-	-	-	-	-	-	-	-	-	-	-	-	-	-	-	-	-	-	-	-	-	-	-	-	-	-	-	-
Cosmarium notabile	CONO	0	0	-	-	-	-	-	-	-	-	-	-	-	-	-	-	-	-	-	-	-	-	-	-	-	-	-	-	-	-	-	-	-	-	-	-	-	-	-	-	-	-	-	-	-	-	-	-
Cosmarium obliquum	COOB	2	0	-	-	-	-	-	-	-	-	-	-	-	+	-	-	-	-	+	r	-	r	-	-	-	-	-	-	-	-	-	-	-	-	-	-	-	-	-	-	-	-	-	-	-	-	-	-
Cosmarium portianum	COPO	1	2	-	-	-	-	-	-	-	-	-	-	-	-	-	-	-	-	-	-	-	-	-	-	-	-	-	-	-	-	-	-	-	-	-	-	-	-	-	-	-	-	-	-	-	-	-	-
Cosmarium pseudobiremum	COPB	3	3	-	+	-	-	-	-	-	-	-	-	-	-	-	-	-	-	-	-	-	-	-	-	-	-	-	-	-	-	-	-	-	-	-	-	-	-	-	-	-	-	-	-	-	-	-	-
Cosmarium punctulatum var. subpunctulatum	COPS	0	0	-	-	-	-	-	-	-	-	-	-	-	-	-	-	-	-	-	-	-	-	-	-	-	-	-	-	-	-	-	-	-	-	-	-	-	-	-	-	-	-	-	-	-	-	-	-
Cosmarium pygmaeum	COPY	2	2	-	-	-	-	-	-	-	-	-	-	-	-	-	-	-	-	-	-	-	-	-	-	-	-	-	-	-	-	-	-	-	-	-	-	-	-	-	-	-	-	-	-	-	-	-	-
Cosmarium quadratum	COQU	0	0	-	-	-	-	-	-	-	-	-	-	-	-	-	-	-	-	-	-	-	-	-	-	-	-	-	-	-	-	-	-	-	-	-	-	-	-	-	-	-	-	-	-	-	-	-	-
Cosmarium regnellii	CORE	0	0	-	-	-	-	-	-	-	-	-	-	-	-	-	-	-	-	-	-	-	-	-	-	-	-	-	-	-	-	-	-	++	-	-	-	-	-	-	-	-	-	-	-	-	-	-	-
Cosmarium reniforme var. compressum	CORC	0	0	-	r	-	-	-	-	-	-	-	-	-	-	-	-	-	-	-	-	-	-	-	-	-	-	-	-	-	-	-	-	-	-	-	-	-	-	-	-	-	-	-	-	-	-	-	-
Cosmarium sinostegos var. obtusius	COSO	3	2	-	-	-	-	-	-	-	-	-	-	-	-	-	-	-	-	-	-	-	-	-	-	-	-	-	-	-	++	-	-	-	-	-	-	-	-	-	-	-	-	-	-	-	-	-	-
Cosmarium sphagnicolum	COSP	3	2	-	-	-	-	-	-	-	-	-	-	-	-	-	-	-	-	-	-	-	-	++	-	-	-	-	-	-	-	-	-	-	+	-	-	-	-	-	-	-	-	-	-	-	-	-	-
Cosmarium sportella var. subnudum	COSS	1	0	-	-	-	-	-	-	-	-	-	r	-	-	-	-	-	-	-	-	-	-	-	-	-	-	-	-	-	-	-	-	-	-	-	-	-	-	-	-	-	-	-	-	-	-	-	-
Cosmarium subcostatum var. minus	COSM	0	0	-	-	-	-	-	-	-	-	-	-	-	-	-	-	-	-	-	-	-	-	-	-	-	-	-	-	-	-	-	-	-	-	-	-	-	-	-	-	-	-	-	-	-	-	-	-
Cosmarium subcucumis	COSC	0	0	-	-	-	-	-	-	-	-	-	-	-	-	-	-	-	-	-	-	-	-	-	-	-	-	-	-	-	-	-	-	-	-	-	-	-	-	-	-	-	-	-	-	-	-	-	-
Cosmarium subgranatum	COSG	0	0	r	-	-	-	-	-	-	-	-	-	-	-	-	-	-	-	-	-	-	-	-	-	-	-	-	-	-	-	-	-	r	-	-	-	-	-	-	-	-	-	-	-	-	-	-	-
Cosmarium tenue	COTE	0	0	-	-	-	-	-	-	-	-	-	-	-	-	-	-	-	-	-	-	-	-	-	-	-	-	-	-	-	+	-	-	-	-	-	-	-	-	-	-	-	-	-	-	-	-	-	-
Cosmarium tinctum	COTI	1	2	-	-	-	-	-	-	-	-	-	-	-	-	-	-	-	-	-	-	-	-	-	-	-	-	-	-	-	-	-	-	-	-	-	-	-	-	-	-	-	-	-	-	-	-	-	-
Cosmarium vexatum var. concavum	COTC	3	0	-	-	-	-	-	-	-	-	-	-	-	-	-	-	-	-	-	-	-	-	-	-	-	-	-	-	-	-	-	-	-	-	-	-	-	-	-	-	-	-	-	-	-	-	-	-
Desmidium swartzii	DESW	0	1	++	-	-	-	-	-	-	-	-	-	-	-	-	-	-	-	-	-	-	-	-	-	-	-	-	-	-	-	-	-	-	-	-	-	-	-	-	-	-	-	-	-	-	-	-	-
Euastrum ansatum	EUAN	0	1	++	-	-	-	-	-	-	-	-	-	-	-	-	-	-	-	-	-	-	-	-	-	-	-	-	-	-	-	+	-	-	-	-	-	-	-	-	-	-	-	-	-	-	-	-	-
Euastrum binale var. gutwinskii	EUBG	0	0	-	-	-	-	-	-	r	-	r	r	++	r	-	-	-	r	+	-	r	++	r	r	r	-	-	-	-	-	r	-	-	-	-	r	r	-	+	-	-	-	-	-	-	-	-	r
Euastrum gayanum	EUGA	0	1	-	-	-	-	-	-	-	-	-	-	-	-	-	-	-	-	-	-	-	-	-	-	-	-	-	-	-	-	-	-	-	-	-	-	-	-	-	-	-	-	-	-	-	-	-	-
Euastrum humerosum	EUHU	0	2	-	-	-	-	-	-	-	-	-	-	-	-	-	-	-	-	-	-	-	-	-	-	-	-	-	-	-	-	-	-	-	-	-	-	-	-	r	r	-	r	-	-	-	-	-	-
Euastrum oblongum	EUOB	0	2	+	-	-	-	-	-	-	-	-	-	-	-	-	-	-	-	-	-	-	-	-	-	-	-	-	-	-	-	-	-	r	-	-	-	-	-	-	-	-	-	-	-	-	-	-	-
Euastrum subalpinum	EUSA	2	0	-	-	-	-	-	-	-	-	-	-	-	-	-	-	-	-	-	-	-	-	-	-	-	-	-	-	-	-	-	-	-	-	-	-	-	-	-	-	-	-	-	-	-	-	-	-
Euastrum verrucosum	EUVR	1	2	-	-	-	-	-	-	-	-	-	-	-	-	-	-	-	-	-	-	-	-	-	-	-	-	-	-	-	r	-	-	-	-	-	-	-	-	-	-	-	-	-	-	-	-	-	-
Haplotaenium minutum	HAMI	2	3	-	-	-	-	-	-	-	-	-	-	-	-	-	-	-	-	-	-	-	-	-	-	-	-	-	-	-	-	-	-	-	-	-	-	-	-	-	-	-	-	-	-	-	-	-	-
Hyalotheca dissiliens	HYDI	0	0	-	-	-	-	-	-	-	-	-	-	-	-	-	-	-	-	-	-	-	-	-	-	-	-	-	-	-	-	+	-	-	-	-	-	-	-	-	-	-	-	-	-	-	-	-	-
Hyalotheca dissiliens var. minor	HYDM	0	0	-	-	-	-	-	-	-	-	-	-	-	-	-	-	-	-	-	-	-	-	-	-	-	-	-	-	-	-	-	-	-	-	-	-	-	++	-	-	-	-	-	-	-	-	-	-
Micrasterias papillifera	MIPA	1	2	-	-	-	-	-	-	-	-	-	-	-	-	-	-	-	-	-	-	-	-	-	-	-	-	-	-	-	-	-	-	r	-	-	-	-	-	-	-	-	-	-	-	-	-	-	-
Micrasterias rotata	MIRO	1	2	++	-	-	-	-	-	-	-	-	-	-	-	-	-	-	-	-	-	-	-	-	-	-	-	-	-	-	-	-	-	-	-	-	-	-	-	-	-	-	r	-	-	-	-	-	-
Micrasterias thomasiana var. notata	MITH	0	1	+	-	-	-	-	-	-	-	-	-	-	-	-	-	-	-	-	-	-	-	-	-	-	r	-	-	-	-	-	-	++	-	-	-	-	-	-	-	-	+	-	-	-	-	-	-
Penium cylindrus	PECY	0	0	-	-	-	-	-	-	-	-	-	-	-	-	-	-	-	-	-	-	-	-	-	-	-	-	-	-	-	-	-	-	-	-	-	-	-	-	-	-	-	-	-	-	-	-	-	-
Penium spirostriolatum	PESS	1	2	-	-	-	-	-	-	-	-	-	-	-	-	-	-	-	-	-	-	-	-	-	-	-	-	-	-	-	-	-	-	-	-	-	-	-	-	-	-	-	-	-	-	-	-	-	-
Pleurotaenium crenulatum	PLCR	0	0	r	-	-	-	-	-	-	-	-	-	-	-	-	-	-	-	-	-	-	-	-	-	-	-	-	-	-	-	-	-	-	-	-	-	-	-	-	-	-	-	-	-	-	-	-	-
Pleurotaenium ehrenbergii	PLEH	0	1	-	r	-	-	-	-	-	-	-	-	-	-	-	-	-	-	-	-	-	-	-	-	-	-	-	r	-	-	-	-	-	-	-	-	-	-	-	-	-	-	-	-	-	-	-	-
Pleurotaenium trabecula	PLTR	1	1	-	-	-	-	-	-	-	-	-	-	-	-	-	-	-	-	-	-	-	-	-	-	-	-	-	-	-	-	-	-	r	-	-	-	-	-	-	-	-	-	-	-	-	-	-	-
Roya obtusa	ROOB	0	0	-	-	-	-	-	-	-	-	-	-	-	-	-	-	-	-	-	-	-	-	-	-	-	-	-	-	-	-	-	-	-	-	-	-	-	-	-	-	-	-	-	-	-	-	-	-
Spondylosium planum	SPPL	3	0	-	-	-	-	-	-	-	-	-	-	-	-	-	-	-	-	-	-	-	-	-	-	-	-	-	-	-	-	+	-	-	-	-	-	-	-	-	-	-	-	-	-	-	-	-	-
Spondylosium pulchellum	SPPU	1	2	-	-	-	-	-	-	-	-	-	-	-	-	-	-	++	++	-	-	-	-	-	-	-	-	-	-	+	-	-	-	-	-	-	-	-	-	-	-	-	-	-	-	-	-	-	-
Staurastrum alternans	STAL	0	1	-	-	-	-	-	-	-	-	-	-	-	-	-	-	-	-	-	-	-	-	-	-	-	-	-	-	-	-	-	-	-	-	-	-	-	-	-	-	-	-	-	-	-	-	-	-
Staurastrum avicula var. lunatum	STAL	1	1	-	-	-	-	-	-	-	-	-	-	-	-	-	-	-	-	-	-	-	-	-	-	-	-	-	-	-	+	-	-	-	-	-	-	-	-	-	-	-	-	-	-	-	-	-	-
Staurastrum furcatum var. aciculiferum	STFA	2	2	-	-	-	-	-	-	-	-	-	-	-	-	-	-	-	-	-	-	-	-	+	-	-	-	-	-	-	-	-	-	-	-	-	-	r	-	-	-	-	-	-	-	-	-	-	-
Staurastrum furcigerum	STFU	1	2	r	-	-	-	-	-	-	-	-	-	-	-	-	-	-	-	-	-	-	-	-	-	-	-	-	-	-	r	+	-	-	-	-	-	-	-	-	-	-	-	-	-	-	-	-	-
Staurastrum hexacerum	STHC	0	0	-	-	-	-	-	-	-	-	-	-	-	-	-	-	-	-	-	-	-	-	-	-	-	-	-	-	-	-	r	-	r	-	-	-	-	-	-	-	-	-	-	-	-	-	-	-
Staurastrum hirsutum	STHR	0	0	-	-	-	-	-	r	r	-	-	-	-	-	-	r	-	-	-	-	-	-	r	+	-	-	-	-	+	-	-	-	-	-	-	-	r	r	-	-	-	-	-	-	-	++	-	+
Staurastrum inflexum	STIN	0	1	-	++	-	-	-	-	-	-	-	-	-	-	-	-	-	-	-	-	-	-	-	-	-	-	-	-	-	r	r	-	-	-	-	-	-	-	-	-	-	-	-	-	-	-	-	-
Staurastrum lapponicum	STLP	1	2	r	-	-	-	-	-	-	-	-	-	-	-	-	-	-	-	-	-	-	-	-	-	-	-	-	-	-	-	-	-	-	-	-	-	-	-	-	-	-	-	-	-	-	-	-	-
Staurastrum margaritaceum	STMG	0	0	-	-	-	-	r	r	+	-	r	r	+	-	-	-	-	-	-	r	-	+	r	r	r	-	-	-	-	-	-	-	-	r	r	r	+	+	r	-	-	-	-	-	-	r	+	r
Staurastrum micron	STMI	2	1	-	-	-	-	-	-	-	-	-	-	-	-	-	-	-	-	-	-	-	-	-	-	-	-	-	-	-	-	-	-	-	-	-	-	-	-	-	-	-	-	-	-	-	-	-	-
Staurastrum paradoxoides	STPA	0	0	-	-	-	-	-	-	-	-	-	-	-	-	-	-	-	-	-	-	-	-	-	-	-	-	-	-	-	-	-	-	-	-	-	-	r	r	-	-	-	-	-	-	-	-	-	-
Staurastrum pileolatum	STPI	2	0	-	-	-	-	-	-	-	-	-	-	-	-	-	-	-	-	-	-	-	-	-	-	-	-	-	-	-	-	-	-	-	-	-	-	-	-	-	r	-	-	-	-	-	-	-	-
Staurastrum punctulatum	STPU	0	0	-	-	-	-	+	-	-	-	-	-	-	-	-	-	-	-	-	-	-	-	-	-	-	-	-	-	-	-	-	-	-	-	-	-	-	-	-	-	-	-	-	-	-	-	-	-
Staurastrum scabrum	STSC	3	3	-	-	-	-	-	-	-	-	-	-	-	-	-	-	-	-	-	-	-	-	r	-	-	-	-	-	-	-	-	-	-	-	-	-	-	-	-	-	-	-	-	-	-	+	-	-
Staurastrum senarium	STSE	3	2	-	-	-	-	-	-	-	-	-	-	-	-	-	-	-	-	-	-	-	-	-	-	-	-	-	-	-	-	-	-	-	-	-	-	-	-	-	-	-	-	-	-	-	-	-	-
Staurastrum simonyi	STSI	1	2	-	-	-	-	-	-	+	-	r	-	-	-	-	-	-	-	-	-	-	r	+	r	-	-	-	-	r	-	-	r	-	r	-	-	-	-	-	r	-	-	-	-	-	-	-	-
Staurastrum striatum	STSR	0	0	-	-	-	-	-	-	-	-	-	-	-	-	-	-	-	-	-	-	-	-	-	-	-	-	-	-	-	-	-	-	-	-	-	-	-	-	-	-	-	-	-	-	-	-	-	-
Staurastrum teliferum	STTE	0	2	-	-	-	-	-	-	-	-	-	-	-	-	-	-	-	-	-	-	-	-	-	-	-	-	-	-	-	-	-	-	-	-	-	-	-	-	-	-	-	-	-	-	-	-	-	-
Staurastrum tetracerum	STTR	0	1	-	-	-	-	-	-	-	-	-	-	-	-	-	-	-	-	-	-	-	-	-	-	-	-	-	-	-	-	-	-	-	-	-	-	-	-	-	-	-	-	-	-	-	-	-	-
Staurodesmus cuspidatus	SDCU	1	1	-	-	-	-	-	-	-	-	-	-	-	-	-	-	-	-	-	-	-	-	-	-	-	-	-	-	-	-	-	-	-	-	-	-	-	-	-	-	-	-	-	-	-	-	-	-
Staurodesmus dickiei	SDDI	2	2	-	++	+	-	-	-	-	-	-	-	-	-	-	-	-	-	-	-	-	-	-	-	-	-	-	-	-	r	+	-	-	-	-	-	-	-	-	-	-	-	-	-	-	-	-	-
Staurodesmus extensus var. extensus	SDEE	1	1	-	-	-	-	-	-	-	-	-	-	-	-	-	-	-	-	-	-	-	-	-	-	-	-	-	-	-	-	-	-	-	-	-	-	-	++	-	-	-	-	-	-	-	-	-	-
Staurodesmus extensus var. isthmosus	SDEI	2	2	-	-	-	-	-	-	-	-	-	-	-	-	-	-	-	-	-	-	-	-	-	-	-	-	-	-	-	-	-	-	-	-	-	-	-	-	-	-	-	-	-	-	-	-	-	-
Staurodesmus extensus var. rectus	SDER	0	1	-	-	-	-	-	-	-	-	-	-	-	-	-	-	-	-	-	-	-	-	-	-	-	-	-	-	-	-	-	-	-	-	-	-	-	-	-	-	-	-	-	-	-	-	-	-
Staurodesmus glaber	SDGL	0	2	-	-	-	-	-	-	-	-	-	-	-	-	-	-	-	-	-	-	-	-	-	-	-	-	-	-	-	r	-	-	-	-	-	-	-	r	-	-	-	-	-	-	-	-	-	-
Staurodesmus mucronatus	SDMU	3	2	-	-	-	-	-	-	-	-	-	-	-	-	-	-	-	-	-	-	-	-	-	-	-	-	-	-	-	+	-	-	-	-	-	-	-	-	-	-	-	-	-	-	-	-	-	-
Staurodesmus omearae	SDOM	0	0	-	-	-	-	-	-	-	-	-	-	-	-	-	-	-	-	-	-	-	-	-	-	-	-	-	-	-	-	-	-	-	-	-	-	-	-	-	-	-	-	-	-	-	-	-	-
Staurodesmus triangularis var. brevispina	SDTB	1	2	-	-	-	-	-	-	-	-	-	-	-	-	-	-	-	-	-	-	-	-	-	-	-	-	-	-	-	-	-	-	-	-	-	-	-	-	-	-	-	-	-	-	-	-	-	-
Teilingia granulata	TEGR	0	1	-	++	-	-	-	-	-	-	-	-	-	-	-	-	-	-	-	-	-	-	-	-	-	-	-	-	-	-	-	-	-	-	-	-	-	-	-	-	-	-	-	-	-	-	-	-
Tetmemorus flensburgii	TTFL	2	2	-	-	-	-	-	-	-	+	-	-	-	-	-	-	-	-	r	-	-	-	-	-	+	-	-	-	-	-	-	-	-	-	-	-	-	-	r	-	-	-	-	-	r	++	-	-
Tetmemorus granulatus	TTGR	0	1	-	-	-	-	-	-	-	-	-	-	-	-	-	-	-	-	-	-	-	-	-	-	-	-	-	-	-	-	-	-	-	-	-	-	-	-	-	-	-	-	-	-	-	-	-	-
Tetmemorus laevis	TTLA	0	0	-	-	-	r	-	++	-	-	-	-	-	-	-	-	-	-	-	-	-	-	-	r	-	-	-	-	-	-	-	-	-	-	-	-	-	-	-	-	-	-	-	-	-	-	-	-
Xanthidium antilopaeum	XAAN	1	1	+	-	-	-	-	-	-	-	-	-	-	-	-	-	-	-	-	-	-	-	-	-	-	-	-	-	-	-	-	-	-	-	-	-	-	-	-	-	-	-	-	-	-	-	-	-
latitude				50.5064306N	50.5037592N	50.5037250N	50.52498N	50.51384N	50.52807N	50.52863N	50.52920N	50.52988N	50.53015N	50.53106N	50.52988N	50.53358N	50.53570N	50.53555N	50.53568N	50.52962N	50.52982N	50.53023N	50.53061N	50.53061N	50.53062N	50.53073N	50.53544N	50.52548N	50.52311N	50.53624N	50.50699N	50.50631N	50.51341N	50.52140N	50.51910N	50.51870N	50.51844N	50.51801N	50.51861N	50.51885N	50.51840N	50.51219N	50.50634N	50.50566N	50.50543N	50.50386N	50.50224N	50.50227N	50.50230N
longitude				13.2462367E	13.2484361E	13.2484494E	13.24463E	13.22715E	13.24198E	13.24214E	13.24245E	13.24301E	13.24293E	13.24311E	13.25494E	13.24648E	13.25462E	13.25463E	13.25521E	13.24954E	13.24936E	13.24891E	13.24820E	13.24798E	13.24719E	13.24451E	13.24152E	13.21021E	13.20880E	13.25518E	13.24720E	13.24652E	13.22728E	13.20850E	13.22576E	13.22740E	13.22830E	13.22932E	13.23129E	13.23175E	13.23230E	13.19930E	13.19739E	13.19775E	13.19809E	13.20029E	13.20160E	13.20201E	13.20419E
pH				6.0	5.8	5.8	6.4	4.5	4.2	4.0	3.9	4.2	4.0	3.8	4.2	4.3	4.7	4.4	4.7	4.0	4.0	4.5	4.5	4.3	4.3	4.5	4.6	6.0	6.2	5.0	6.5	6.0	5.3	5.3	4.3	4.5	4.3	4.0	4.2	4.3	4.5	6.0	5.2	4.9	4.5	4.2	4.0	4.0	4.8
conductivity [μm/cm]				92	86	90	74	35	37	31	88	57	78	70	66	16	28	26	26	80	71	73	70	60	61	68	120	82	78	54	134	53	45	65	94	42	66	38	38	40	42	73	39	40	32	86	45	60	34
depth [cm]				30	50	200	5	5	7	7	7	5	5	20	7	7	100	100	100	7	5	10	15	20	7	30	50	60	70	100	100	30	120	40	5	20	5	15	20	15	15	20	15	50	15	10	10	7	5
habitat type [D - peatbog ditch, G - peatbog pool, L - extracted peatbog, P - pond, R - restored peatbog pool, S - stream, T - minerotrophic pool]				P	T	T	S	T	G	G	G	G	G	G	G	D	P	P	P	G	G	G	G	G	G	D	P	S	P	P	P	P	T	P	G	L	L	L	L	L	L	T	T	P	T	G	T	T	T
species richness				15	7	4	3	2	3	4	3	3	5	4	2	1	1	2	3	5	3	3	6	10	7	3	4	1	5	4	9	11	2	12	4	1	2	6	7	4	3	3	8	5	1	2	5	1	4
sampling date				Oct 18 2021	Oct 18 2021	Oct 18 2021	Oct 18 2021	Oct 18 2021	Oct 18 2021	Oct 18 2021	Oct 18 2021	Oct 18 2021	Oct 18 2021	Oct 18 2021	Oct 18 2021	Oct 27 2021	Oct 27 2021	Oct 27 2021	Oct 27 2021	Oct 27 2021	Oct 27 2021	Oct 27 2021	Oct 27 2021	Oct 27 2021	Oct 27 2021	Oct 27 2021	Oct 27 2021	Oct 27 2021	Oct 27 2021	Oct 27 2021	Oct 27 2021	Oct 27 2021	Nov 8 2021	Nov 8 2021	Nov 8 2021	Nov 8 2021	Nov 8 2021	Nov 8 2021	Nov 8 2021	Nov 8 2021	Nov 8 2021	Nov 8 2021	Nov 8 2021	Nov 8 2021	Nov 11 2021	Nov 11 2021	Nov 11 2021	Nov 11 2021	Nov 11 2021
NCV index primary data
Σ d				15	7	4	3	2	3	4	3	3	5	4	2	1	1	2	3	5	3	3	6	10	7	3	4	1	4	4	9	11	2	12	4	1	2	6	7	4	3	3	8	5	1	2	5	1	4
D				2	1.6	1.2	1.2	1.2	1.4	1.6	1.4	1.4	1.8	1.6	1.2	1	1	1.2	1.4	1.8	1.4	1.4	2	2	2	1.4	1.6	1	1.2	1.2	1.8	2	1	2	1.6	1	1.2	2	2	1.6	1.4	1.2	1.6	1.8	1	1.2	1.8	1	1.6
Σ r				5	6	5	3	0	0	1	3	1	2	1	2	0	0	1	1	5	3	1	4	13	1	2	1	0	3	2	11	8	1	3	5	0	0	2	2	2	3	1	5	4	0	3	5	0	0
R				1.8	2	1.8	1.4	0	0	1	2	1	1.5	1	1.5	0	0	1	1	2	2	1	2	2.2	1	1.5	1	0	1.4	1.2	2	2	1	1.4	2	0	0	1.5	1.5	1.5	2	1	1.8	2	0	2	2	0	0
Σ s				15	10	6	1	0	0	2	5	2	3	3	0	0	0	2	2	5	2	3	5	15	3	2	6	0	1	4	14	6	2	8	6	0	0	4	6	4	4	1	11	4	0	4	5	0	0
S				2	1.8	1.4	1	0	0	1.2	1.8	1.2	1.4	1.4	0	0	0	1.2	1.2	1.8	1.2	1.4	1.8	2.6	1.4	1.2	2	0	1	1.2	2	1.4	1	1.6	2	0	0	1.6	2	1.6	1.6	1	2	1.6	0	1.6	1.8	0	0
modified NCV				5.8	5.4	4.4	3.6	1.2	1.4	3.8	5.2	3.6	4.7	4	2.7	1	1	3.4	3.6	5.6	4.6	3.8	5.8	6.8	4.4	5.1	4.6	1	3.6	3.6	5.8	5.4	3	5	5.6	1	1.2	5.1	5.5	4.7	5	3.2	5.4	5.4	1	4.8	5.6	1	1.6
Σ d				15	7	4	3	2	3	4	3	3	5	4	2	1	1	2	3	5	3	3	6	10	7	3	4	1	4	4	9	11	2	12	4	1	2	6	7	4	3	3	8	5	1	2	5	1	4
D				2	1	1	1	1	1	1	1	1	1	1	1	1	1	1	1	1	1	1	2	2	2	1	1	1	1	1	1	2	1	2	1	1	1	2	2	1	1	1	1	1	1	1	1	1	1
Σ r				5	6	5	3	0	0	1	3	1	2	1	2	0	0	1	1	5	3	1	4	13	1	2	1	0	3	2	11	8	1	3	5	0	0	2	2	2	3	1	5	4	0	3	5	0	0
R				1	2	1	1	0	0	1	2	1	1	1	1	0	0	1	1	2	2	1	2	2	1	1	1	0	1	1	2	2	1	1	2	0	0	1	1	1	2	1	1	2	0	2	2	0	0
Σ s				15	10	6	1	0	0	2	5	2	3	3	0	0	0	2	2	5	2	3	5	15	3	2	6	0	1	4	14	6	2	8	6	0	0	4	6	4	4	1	11	4	0	4	5	0	0
S				2	1	1	1	0	0	1	1	1	1	1	0	0	0	1	1	1	1	1	1	2	1	1	2	0	1	1	2	1	1	1	2	0	0	1	2	1	1	1	2	1	0	1	1	0	0
NCV				5	4	3	3	1	1	3	4	3	3	3	2	1	1	3	3	4	4	3	5	6	4	3	4	1	3	3	5	5	3	4	5	1	1	4	5	3	4	3	4	4	1	4	4	1	1
[truncated: 161 more columns]
