# Supplementary material for: Ecological monitoring of disturbed mountain peatlands: an analysis based on desmids
Source: Springer Nature journal article supplement (doi:10.1007/s10531-023-02624-9), 2023-05-29
Supplement: MOESM2 [file 25420776]

Title: Ecological monitoring of disturbed mountain peatlands – an analysis based on desmids

Journal name: Biodiversity & Conservation

Author names: Jiri Neustupa, Jan Stastny, Katerina Woodard

Corresponding author: Jiri Neustupa, Department of Botany, Faculty of Science, Charles University Prague, email: neustupa@natur.cuni.cz

**Online Resource 2** Mean values and standard deviation intervals of pH, species richness, and nature conservation value (NCV) for individual habitat types

| **habitat types** | **mean pH** | **[-S.D., S.D.]** | **species richness** | **[-S.D., S.D.]** | **NCV** | **[-S.D., S.D.]** |
| --- | --- | --- | --- | --- | --- | --- |
| **D** | 4.63 | [4.11, 5.15] | 3.3 | [1.3, 5.3] | 3.32 | [1.78, 4.86] |
| **G** | 4.18 | [3.97, 4.39] | 4.3 | [2.5, 6.1] | 4.73 | [3.62, 5.84] |
| **L** | 4.26 | [4.07, 4.45] | 3.3 | [1.5, 5.1] | 2.65 | [0.71, 4.59] |
| **P** | 5.34 | [4.75, 5.93] | 6.1 | [1.3, 10.9] | 3.88 | [2.20, 5.56] |
| **R** | 4.26 | [4.38, 4.14] | 1.6 | [0.9, 2.3] | 1.73 | [0.66, 2.80] |
| **S** | 6.04 | [5.61, 6.47] | 3.3 | [1.1, 5.5] | 2.58 | [1.49, 3.67] |
| **T** | 5.30 | [4.57, 6.03] | 4.3 | [1.5, 7.1] | 3.30 | [1.81, 4.79] |

D: old drainage channels; G: bog pools; L: recent drainage channels; P: dystrophic ponds; R: restored bog pools; S: streams; T: minerotrophic fen pools
